# Supplementary material
Source: PubMed Central journal article supplement (PMC1360567)
Supplement: pnas_0510130103_8.pdf [file pnas_0510130103_8.pdf]

**Table 1: Values used for the sensitivity tests**

| Parameter                   | Value Index |        |        |        |       |       |       |       |     |
|-----------------------------|-------------|--------|--------|--------|-------|-------|-------|-------|-----|
|                             | 0           | 1      | 2      | 3      | 4     | 5     | 6     | 7     | 8   |
| $\Psi'$ (auxin import rate) | 0           | 0.48   | 0.93   | 1.8    | 3.5   | 6.8   | 13    | 26    | 50  |
| $\delta$ (degradation rate) | 0           | 0.0007 | 0.0015 | 0.003  | 0.006 | 0.012 | 0.025 | 0.05  | 0.1 |
| $\Psi$ (pumping strength)   | 0           | 5      | 8      | 13     | 20    | 25    | 30    | 35    | 40  |
| $\Gamma$ (diffusion factor) | 0           | 0.004  | 0.008  | 0.016  | 0.03  | 0.057 | 0.11  | 0.21  | 0.4 |
| $P$ (auxin injection rate)  | 0           | 0.0178 | 0.0316 | 0.0562 | 0.1   | 0.177 | 0.316 | 0.562 | 1   |

Note that the values tested follow almost always an exponential law.
