# Supplementary material
Source: PubMed Central journal article supplement (PMC1360567)
Supplement: pnas_0510130103_9.pdf [file pnas_0510130103_9.pdf]

**Table 2: Ranges of each parameter for which the auxin patterns are stable.**

| Parameter | Minimum | Maximum | Ratio (max/min) |
|-----------|---------|---------|-----------------|
| $\Psi'$   | 1.8     | 3.5     | 2               |
| $\delta$  | 0.003   | 0.05    | 16              |
| $\Psi$    | 8       | 40+     | 5+              |
| $\Gamma$  | 0.008   | 0.11    | 13              |

Note that the variations on pumping factor shows a stable pattern even for the highest value tested. The actual range of stability may thus be even greater than the one presented here.
