# Supplementary material
Source: PubMed Central journal article supplement (PMC1360567)

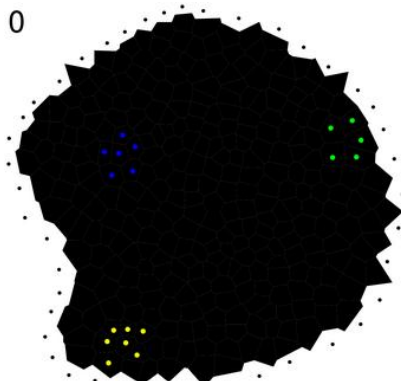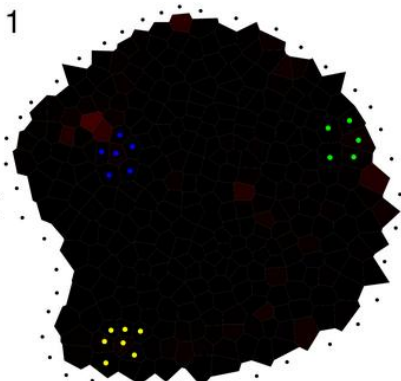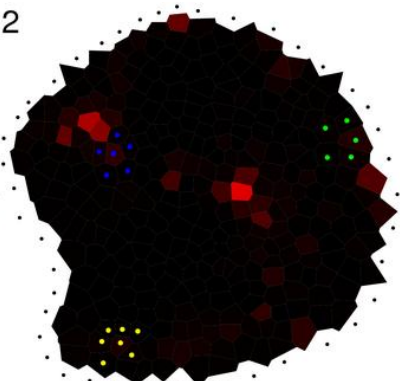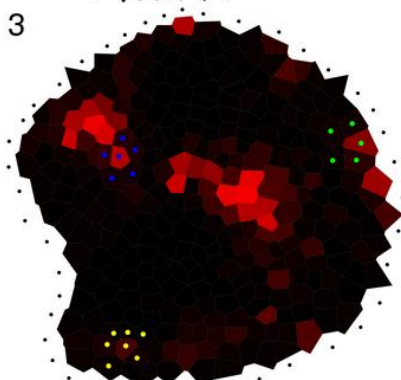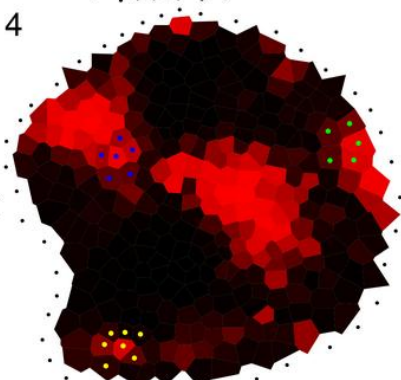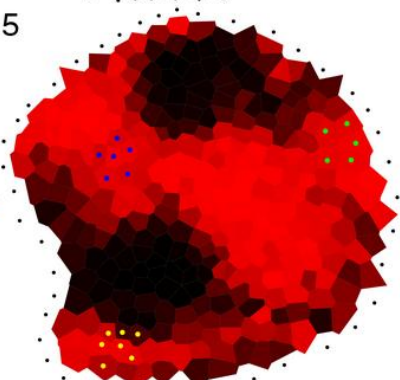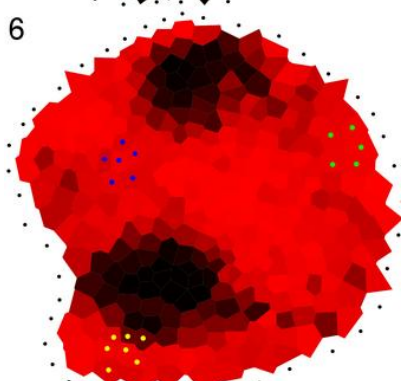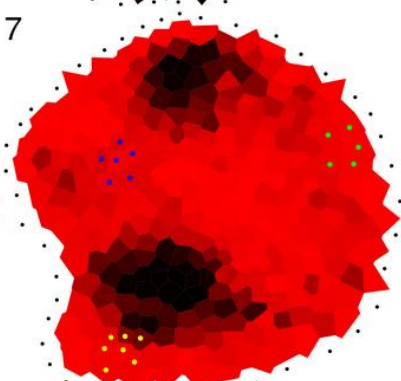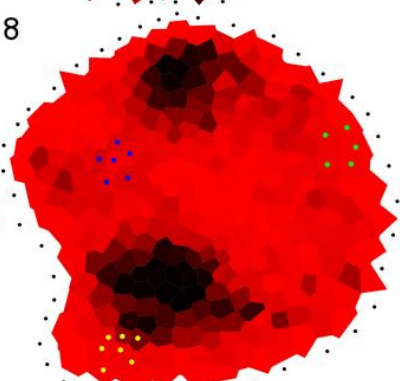

Supplement: pnas_0510130103_1.pdf [file pnas_0510130103_1.pdf]

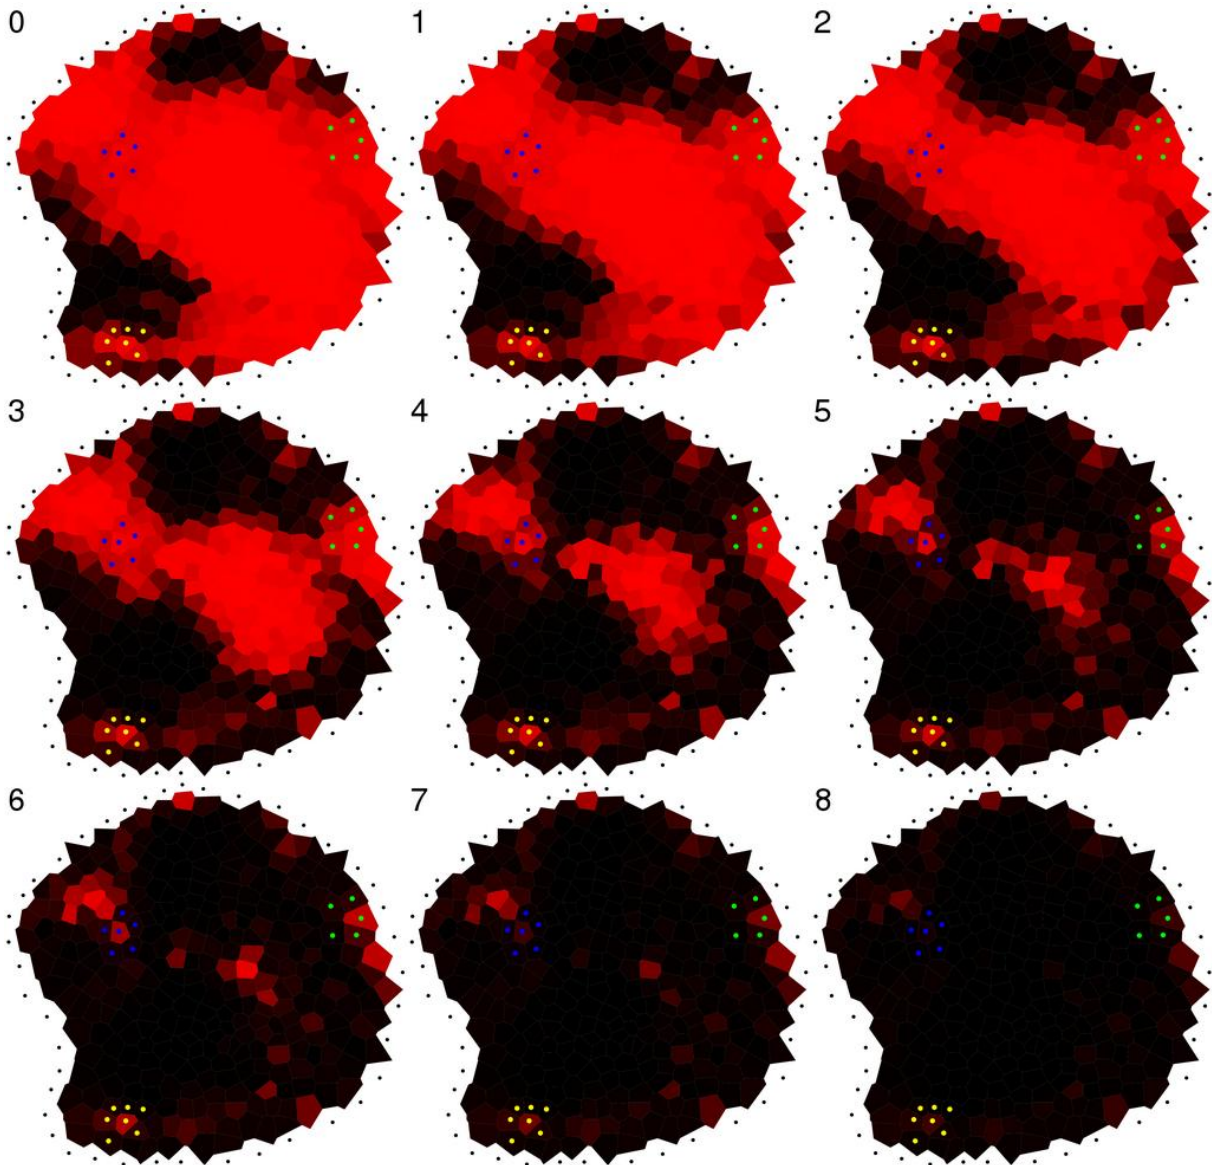

Supplement: pnas_0510130103_2.pdf [file pnas_0510130103_2.pdf]

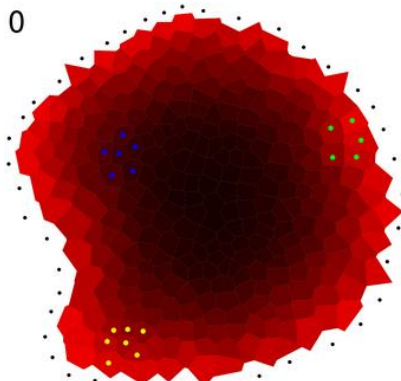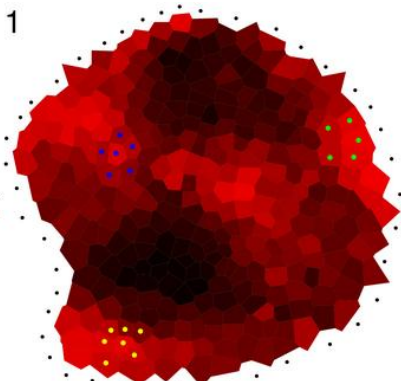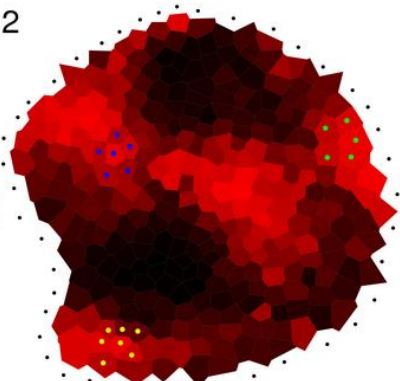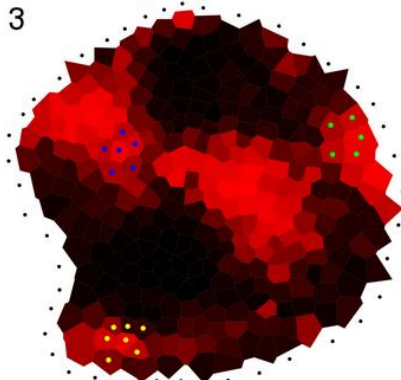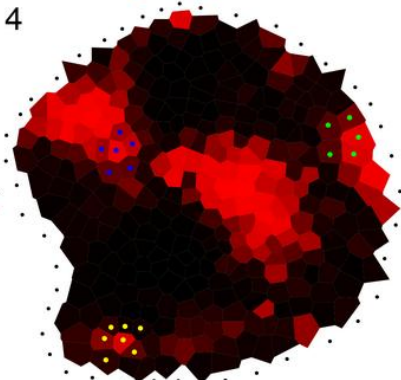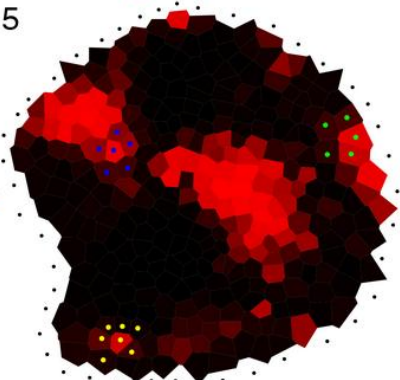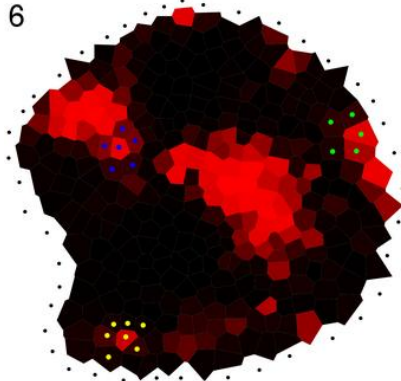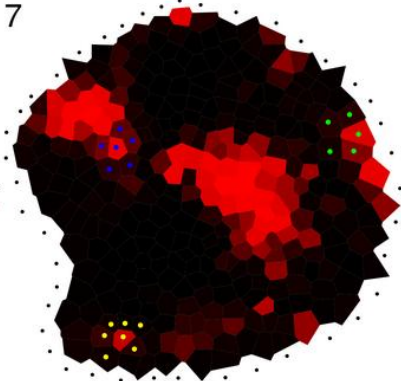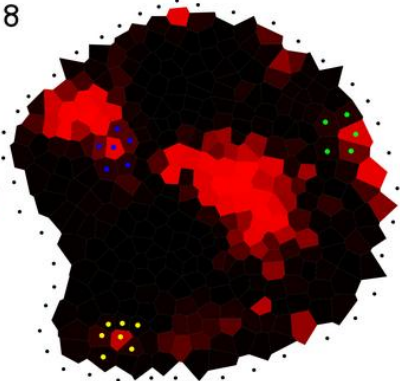

Supplement: pnas_0510130103_3.pdf [file pnas_0510130103_3.pdf]

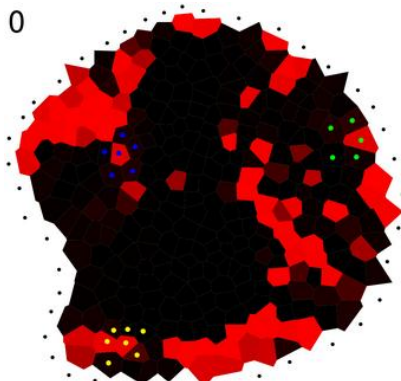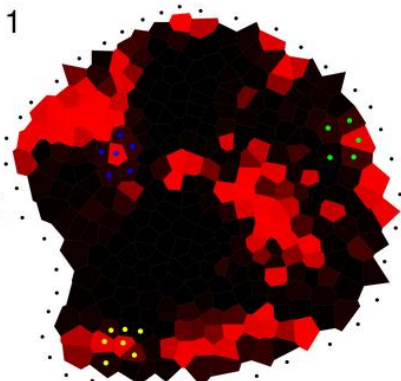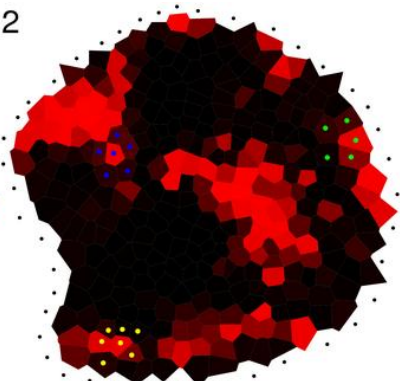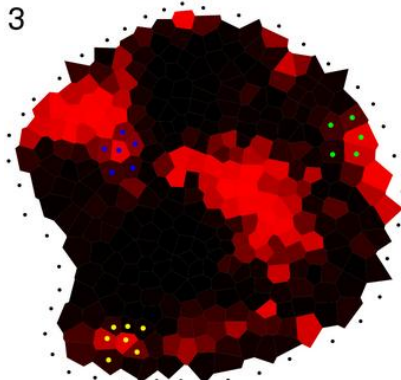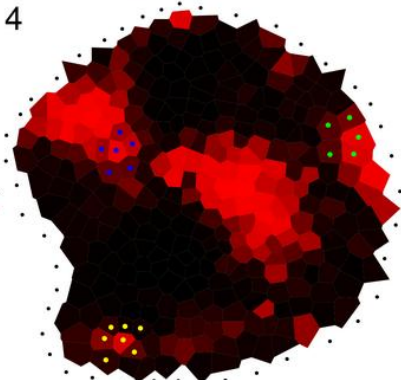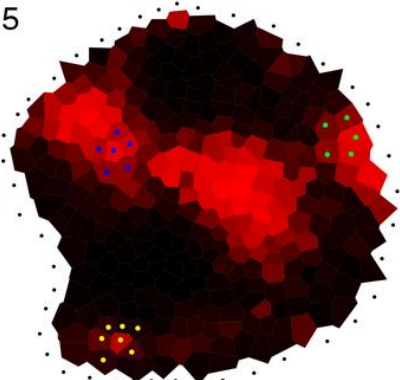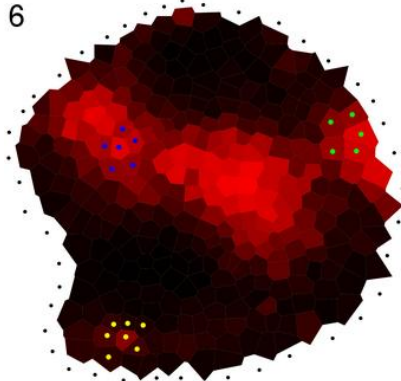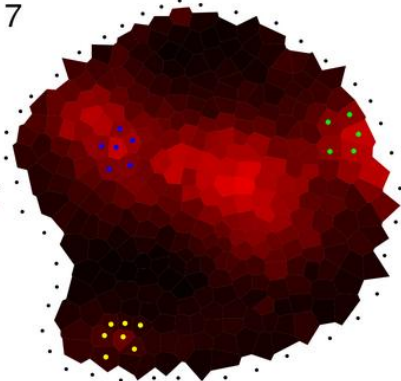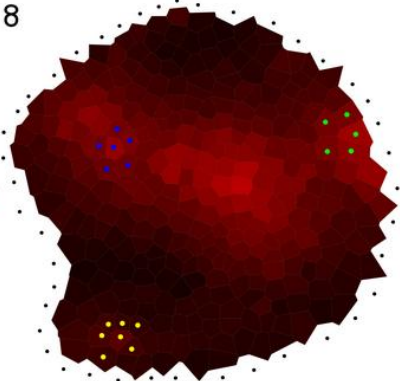

Supplement: pnas_0510130103_4.pdf [file pnas_0510130103_4.pdf]

(A)

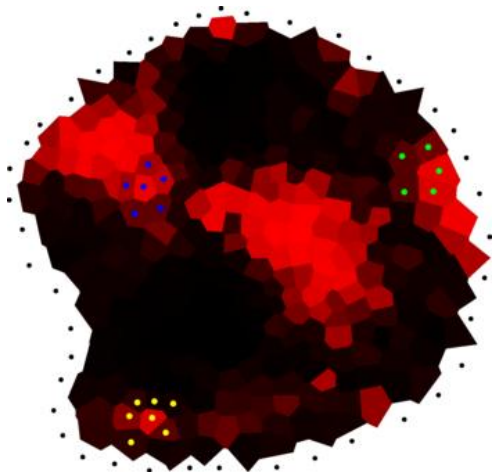

(B)

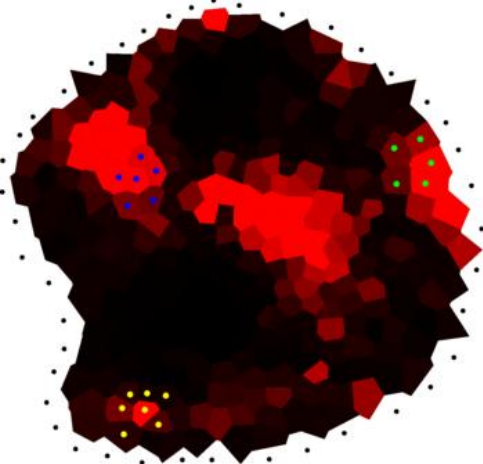

(C)

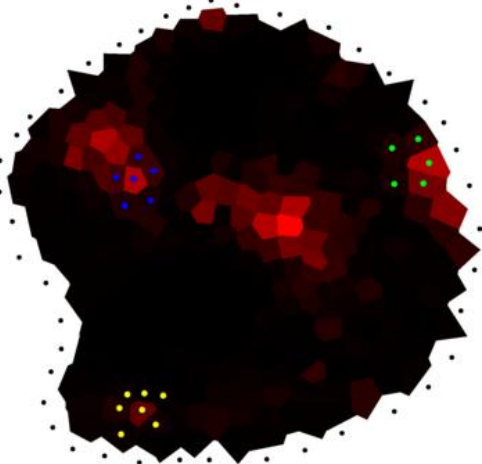

Supplement: pnas_0510130103_5.pdf [file pnas_0510130103_5.pdf]

(A)

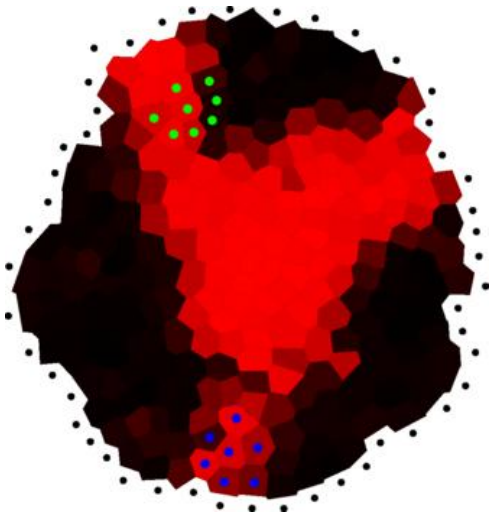

(B)

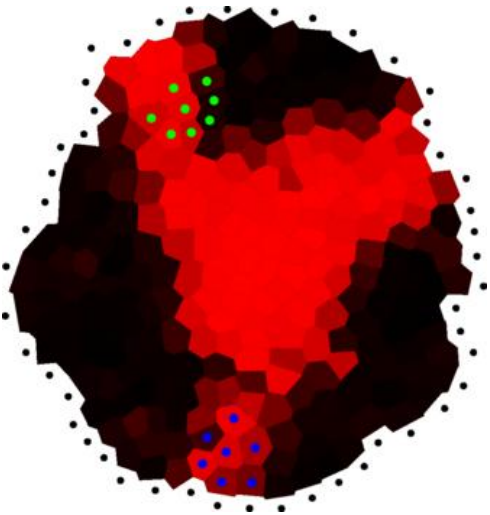

(C)

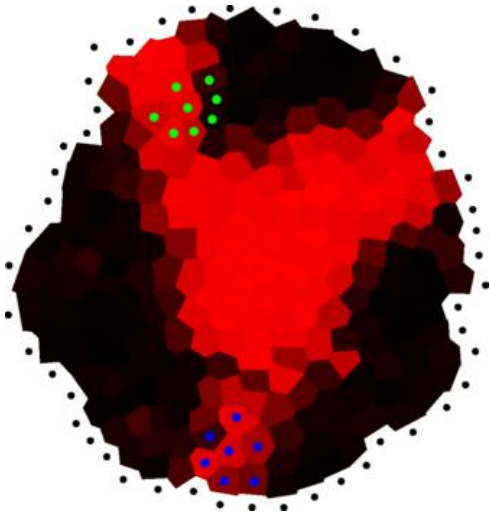

(D)

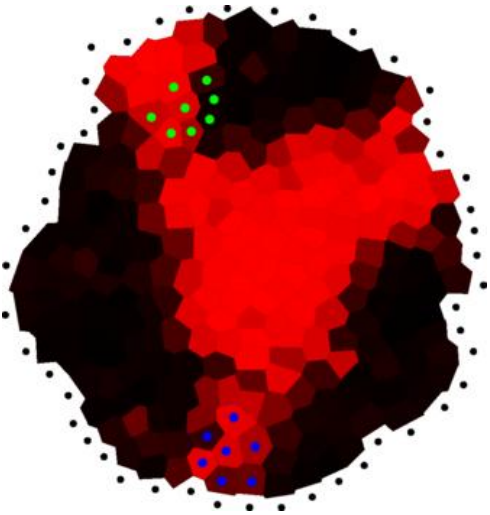

Supplement: pnas_0510130103_6.pdf [file pnas_0510130103_6.pdf]
